1 Inhibition of Lipopolysaccharide *E. coli*-induced acute lung  
2 injury by extracted *Antidesma bunius* (L.) Spreng fruits as  
3 compared to Fluticasone Propionate, a corticosteroid.

4 **Maria Nilda M. Muñoz**<sup>1,2, #a\*</sup>, **Jennifer Lucero**<sup>3</sup>, **Kimberly Stacy Hope Benzon**<sup>3</sup>,  
5 **Jerica Isabel L. Reyes**<sup>3, #a</sup>, **Charina de Silva**<sup>3</sup>, **Reuel C. Delicana**<sup>3</sup>, **Urdujah A.**  
6 **Tejada**<sup>1</sup>, **Swapan Chatterjee**<sup>4</sup>, **Kozo Watanabe**<sup>#a\*</sup>

7  
8 <sup>1</sup>Research and Development Extension, Cagayan State University, Tuguegarao  
9 City, Cagayan Valley, Philippines

10 <sup>2</sup>Center for Natural Sciences and Environmental Research, De La Salle University,  
11 Metro Manila, Philippines

12 <sup>3</sup>Basic Science and Health-related Research, St. Luke's Medical Center College of  
13 Medicine, Metro Manila, Philippines

14 <sup>4</sup>Molecular Pharma Pvt. Ltd. ZEN, with Office at Unit 14C, 14<sup>th</sup> Floor Tower A, 46B  
15 Matheshwartalla Road, Topsia Crossing, Kolkata – 700046, India

16 #a\*Center for Marine and Environmental Studies, Ehime University, Ehime, Japan

17

18 \*Corresponding authors:

19 E-mail: [nmmunoz@csu.edu.ph](mailto:nmmunoz@csu.edu.ph) (MNMM)

20 [nildzmunoz@gmail.com](mailto:nildzmunoz@gmail.com) (MNMM)

21 [watanabe.kozo.mj@ehime-u.ac.jp](mailto:watanabe.kozo.mj@ehime-u.ac.jp) (KW).

22

23 **Short Title:** *Antidesma bunius* (L.) Spreng inhibits biomarkers of ALI

## 24 **Abstract**

25 The hallmark of Acute Lung Injury/Acute Respiratory Distress Syndrome  
26 (ALI/ARDS) is inflammation-induced alveolar-vascular barrier destruction and  
27 neutrophilic infiltration that leads to the formation of cytokines and oxygen radicals.  
28 The objective of the study is to investigate the protective and toxicological effects  
29 of *Antidesma bunius* (L.) Spreng [Bignay] in murine model of Lipopolysaccharide *E.*  
30 *coli* (LPS)-induced ALI and compared with Fluticasone Propionate (FP), a synthetic  
31 corticosteroid. We showed that extracted Bignay fruits have high amount of  
32 phenols, steroids and flavonoids but insignificant amount of heavy metals and  
33 aflatoxins. BALB/c mice of either sex were divided into 4 groups in the ALI mouse  
34 model; Group 1: vehicle control; Group 2: LPS alone; Group 3: Bignay + LPS; and  
35 Group 4: FP + LPS. Bignay and FP were administered via intraperitoneal injection  
36 while LPS was given intra-tracheally. Biomarkers of ALI such as total lung  
37 inflammatory cell count, total lung protein content, lung edema and interleukin-6  
38 (IL-6) secretion were measured 24 hrs after vehicle control or LPS treatment.  
39 Compared to vehicle controls, LPS caused significant increased in all measured  
40 biomarkers of ALI in samples collected from bronchoalveolar lavage fluid and were  
41 significantly attenuated by Bignay fruit extract or FP. Pulmonary vascular leakage  
42 caused by LPS was also evaluated after injection with Evans blue dye, an  
43 indication of lung injury. Extracted Bignay fruits or FP when given to mice 2 hrs  
44 after LPS administration substantially decreased the pulmonary vascular leak. Our

45 findings are the first evidence demonstrating the preventive and non-toxic effects of  
46 extracted Bignay fruits in a murine model of LPS-induced ALI. The results could be  
47 attributed to the presence of active secondary metabolites such as flavonoids,  
48 phenols and steroids. It is also evident that extracted Bignay fruits are as effective  
49 as FP, well-established steroid, in blocking the biomarkers of ALI caused by LPS.

## 50 **Introduction**

51  
52 Acute lung injury/acute respiratory distress syndrome (ALI/ARDS) is a life-  
53 threatening disease characterized by inadequate oxygenation, pulmonary  
54 infiltration, and observation of onset in critically ill patients [1-4]. This can arise from  
55 a plethora of insults, either direct or indirect, to the lung [1-3]. Increased epithelial  
56 permeability results from the insult, leading to alveolar flooding of a protein-rich  
57 edema fluid, increased expression of cytokines and chemokines and upregulation  
58 of adhesion molecules [2,4,5]. Acute respiratory failure and usually catastrophic  
59 disease such as ALI/ARDS, lead to the resulting loss of gas exchange, requiring  
60 assistance for ventilatory and critical care. ALI/ARDS has a high mortality rate and  
61 there are few successful therapeutic modalities to fight this disease [1-4].

62 There has been a growing interest in medicine derived from natural  
63 products, and ongoing studies are actively investigating *in vivo* and *in vitro* multiple  
64 curative plants for various inflammatory diseases [9,10]. To date, in many rural  
65 areas and low-income communities, the cost of synthetic medication is growing  
66 and becoming unavailable. Because of these issues, there are mounting concerns

67 about developing herbal medicine around the world. The use of herbal medicine is  
68 currently expected to be more practical due to its affordability, availability, and,  
69 most significantly, less harmful to humans. Previous studies have shown that  
70 various parts of medicinal plants are consumed by ingestion, decoction and  
71 topically applied to infected parts of the body [9,11,12]. Nevertheless, there is still a  
72 lack of consistent and full knowledge on the composition of plant extracts used in  
73 herbal medicine, as well as the occasional toxicity of adulterants and/or  
74 environmental contaminants [12-14].

75 In Bignay extracts, both heavy metals [15,16] and aflatoxins [17,18] were  
76 assessed because these toxins are extremely stable prior to experimental  
77 procedures under most storage, handling and dispensation conditions. In plants  
78 that grow in the soil, lead (Pb) and cadmium (Cd) are among the heavy metals  
79 since they are normal components of the earth's crust (Agency for Toxic  
80 Substances and Disease Registry, 2011). In popular foods, we consume more  
81 heavy metals every day, but if added at elevated levels, it can cause toxicity.

82 Aflatoxins are naturally occurring compounds that are produced from the  
83 molds *Aspergillus flavus* and *Aspergillus parasiticus* [19,20]. These are also  
84 produced in soil when cultivated in a wide range of agricultural products [19,20]. An  
85 aflatoxin acceptance limit of 20 parts per billion (ppb) has been set by the US Food  
86 and Drug Administration for meats, including fruits, and for most feedstuffs and  
87 ingredients. On the other hand, the European Union has reached the level of

88 tolerance of aflatoxin B1 and complete aflatoxin in nuts, dried fruits and cereals for  
89 human consumption at 2 and 4 ppb, respectively. Due to the proposed restrictions,  
90 the presence of aflatoxin in agricultural products is not only a significant food safety  
91 problem, but also has important cost-effective implications for the agricultural and  
92 pharmaceutical industries.

93         The Philippines is known for its abundance of flora and that herbal medicine  
94 had long been used even before the advent of synthesized medicine. In herbal  
95 medicine, the leaves and stems are usually involved; fruits, however, have  
96 medicinal uses as well. For example, berries such as *Antidesma bunius* (L.)  
97 Spreng [Bignay], *Synsepalum dulcificum* (Miracle Berry), *Basella Alba linn*  
98 (Alugbati), and *Morus alba L.* (Mulberry) are grown in the Philippines and is noted  
99 for its high levels of phenols and flavonoids due to its anti-oxidant activity [21-25].  
100 Phytochemical studies of berries, saponins and phytosterols, have been reported  
101 contributing to the anti-inflammatory activities of extracted fruits [26-29]. However,  
102 the anti-inflammatory effect of berries on biomarkers of ALI/ARDS, in particular  
103 *Antidesma bunius* (L.) Spreng fruits, has yet to be investigated.

104         In the Philippines and other countries such as southern China, Vietnam,  
105 India's lower Himalayas, Thailand, Indonesia, Singapore, New Guinea, Cuba and  
106 Florida, the *Antidesma bunius* (L.) Spreng fruit is commonly called "Bignay or  
107 Bugnay" and belongs to the family of Phyllanthaceae. For the prevention of  
108 diabetes, urinary tract infection and hypertension [31-33], Bignay and other fruits

109 are normally boiled or eaten raw by indigenous Filipinos. While important active  
110 components of Bignay [9,21,26,27,31] have been identified, little is known about  
111 the efficacy of Bignay in the *in vivo* system, particularly as a result of its use to  
112 improve lung disorders such as asthma and ALI/ARDS.

113 The protective and toxicological effects of Bignay fruit extracts in LPS-  
114 induced ALI and possible mechanisms involved were investigated in this study. We  
115 chose this model because LPS produces a relatively mild form of ALI without  
116 causing death [35,36]. To our knowledge, there is no scientific evidence  
117 concerning the protective and toxicological effects of Bignay in ALI/ARDS on either  
118 humans or animals. Further exploration of Bignay should establish the pathological  
119 role of the inadequately characterized Bignay fruit in lung disorders and other  
120 inflammatory diseases.

121

## 122 **Materials and methods**

### 123 **Chemicals/Reagents/Plant sample**

124 Lipopolysaccharide *E. coli* (LPS) and other chemicals were obtained from Sigma-  
125 Aldrich Chemical Co. (St. Louis, MO., USA) unless otherwise specified.  
126 Precautionary measures in handling LPS were followed as outlined in the Material  
127 Safety Data Sheet. Mouse ELISA Interleukin (IL)-6 kit was purchased from  
128 Invitrogen, Philippines. Fluticasone Propionate (GlaxoSmithKline) was a gift from

129 Dr. Teresita de Guia, Philippine Foundation for Lung Health Research  
130 Development, Philippine Heart Center, Quezon City.

131 *Antidesma bunius* (L.) Spreng (Bignay) fruits were harvested from Cagayan  
132 Valley farm, Region 2, Philippines during the month of May-July (Fig 1). A voucher  
133 sample was sent for authentication to the National Museum of the Philippines.

134 After collection, Bignay fruits were washed, oven-dried and pulverized. Bignay  
135 fruits were extracted in 70% of Laboratory grade ethyl alcohol and were stirred at  
136 50°C for 4 hrs. The mixture was filtered via gravimetric filtration using Whatman  
137 filter paper No. 1 (SigmaAldrich Chemical Co.) and the filtrate was concentrated to  
138 remove any residual alcohol using a GeneVac (SP Scientific, Stone Ridge NY).  
139 The device was set at 40°C until syrupy in appearance was achieved. The residue  
140 was stored at -80°C and resuspended in distilled water prior to its use.

141

142 **Fig 1. *Antidesma bunius* (L.) Spreng (Bignay).** The seasonal fruits belong to the  
143 family Phyllanthaceae. It is a native of the Philippines, commonly known as "Bignay  
144 or Bugnay", and the fruiting season is between May and July. In grapelike clusters,  
145 the round or ovoid fruit is borne and it matures unevenly. Unripe Bignay fruits,  
146 reddish orange in color, were used in this study because preliminary data showed  
147 that the presence of secondary metabolites was greater than that of matured ripe  
148 Bignay.

## 149 **Quantitation of Contaminants and secondary metabolites**

### 150 **Measurement of Heavy Metals**

151  
152 The fresh Bignay fruits were oven dried until the moisture content is equivalent  
153 to 13%. Dried Bignay fruits samples were first digested using wet digestion method  
154 [37]. Briefly, 0.2 g of dried samples were taken in 100 mL flask and immediately, 4  
155 mL of 0.02M HNO<sub>3</sub> acid was added. The mixture was allowed to stand for 4 hrs,  
156 heated over water bath till red fumes coming from flask ceases. After cooling, 4  
157 mL perchloric acid was added to the flask and heated again over water bath till  
158 small amount was left; subjected to filtration using Whatman filter paper #42  
159 (SigmaAldrich Chemical Co.). The filtrate was injected to Flame Atomic Absorption  
160 Spectrophotometer (Shimadzu AA-7000) for determination of Lead (Pb), and  
161 Cadmium (Cd) in prepared samples.

### 162 **Measurement of Aflatoxins**

163 The total content of aflatoxin and aflatoxin B1 were quantified using AgraQuant®  
164 Total Aflatoxin Test Kits from Romer Labs, Singapore to ensure that *Antidesma*  
165 *bunius* (L.) Spreng [Bignay] fruits are free from traces of toxic substances. These  
166 kits are kits for enzyme-linked immunosorbent assay (ELISA) and the protocols for  
167 the study were followed according to instructions by manufacturer. Using the BMG  
168 LABTECH Spectrostar Nano Microplate Reader (BMG Lab Tech, Germany) set at  
169 450 nm, the absorbance of standards and samples was measured. The Bignay  
170 samples were used for triplicate measurements of the overall aflatoxin and



171 aflatoxin B1 content. Data are expressed as the mean values in parts per billion  
172 (ppb).

### 173 **Determination of Total Phenolics**

174 Total phenolic content was determined by Folin-Ciocalteu's phenol reagent and  
175 2% Na<sub>2</sub>CO<sub>3</sub> [38]. The external calibration was performed using different  
176 concentrations of Gallic Acid (GA) *i.e.*, 0.00, 25 µL, 50 µL, 100 µL, 250 µL, and 400  
177 µL. The reaction mixtures were performed in triplicate, and phenolic content was  
178 measured using Spectrostar Nano UV/Vis Spectrophotometer (BMG Lab Tech,  
179 Germany) set at 765 nm. Results were expressed in mean ± standard error of  
180 mean (SEM) as mg GA equivalent per gram sample using GA calibration curve.

### 181 **Determination of Total Flavonoids**

182 The total flavonoid content of Bignay was measure by aluminum chloride (AlCl<sub>3</sub>)  
183 method [39]. The mixture of Bignay (1 mL sample + 4 mL water) was placed in 50  
184 mL volumetric flask. A 0.3 mL 5% NaNO<sub>2</sub> was added to the mixture and was kept  
185 in dark place for 6 min; thereafter, 0.3 mL 10% AlCl<sub>3</sub> was added. Five min later, 5%  
186 NaOH was added to complete the reaction. Absorbance of sample against blank  
187 was read at 510 nm using Spectrophotometer (BMG Lab Tech, Germany).  
188 Quercitin standard was used for the calibration curve, generated using five point  
189 concentrations of 25 µL, 125 µL, 250 µL, 350 µL, and 500 µL in a multiplate.  
190 Values were expressed in mean ± standard error of mean (SEM) in terms of  
191 flavonoid content (quercitin equivalent per g of dry weight).

## 192 **Determination of Total Steroids**

193 Estimation of total amount of steroids was performed by Liebermann Burchard  
194 reaction [40].

195 Standard calibration levels were prepared using cholesterol as recommended in  
196 the manufacturer's kit protocol. All these reaction test tubes (standards) were  
197 gently vortexed for 10 secs and put in a water bath (37°C) for 10 min. The solution  
198 was allowed to cool down to room temperature for 10 mins after incubation. A 300  
199  $\mu$ L of Bignay extracts were pipetted and then combined with 2.50 mL of the  
200 cholesterol color developer. For 10 secs, the resulting mixture was vortexed and  
201 the reaction tubes were incubated for 10 mins in a 37°C water bath. The test tubes  
202 were allowed to cool down to room temperature prior to absorbance reading. The  
203 same powder as Bignay was prepared for Lagundi powder, which acts as the  
204 positive control for this assay. The spectrophotometer was set at 620 nm, which  
205 was used as a blank solution for distilled water. Readings of all standards and  
206 samples were registered and the triplicate and two separate experiments were  
207 performed. Data are expressed as mean +/- standard error of mean (SEM).

208

## 209 **Experimental Animals and Biomarkers of ALI**

### 210 **Preparation of Animals**

211 BALB/c mice (8-10 weeks, ~20-25 g in weight) of either sex were purchased from  
212 Research & Development, St. Luke's Medical Center and College of Veterinary

213 Medicine, Animal Research Facility at Cagayan State University, Philippines. The  
214 reported studies were consistent with the concepts outlined by the guidelines of the  
215 Institutional Animal Care and Use Committee (IACUC) and Animal Research:  
216 Reporting in Vivo Experiments (ARRIVE) in biomedical research [41]. A permit to  
217 ensure the proper treatment and use of animals for this study was provided by the  
218 Philippine Bureau of Animal Industry.

219 Experimental design

220 BALB/c mice of either sex were divided into 4 groups:

221 Group 1 (n=5 mice): vehicle control [no LPS, no Bignay, no Fluticasone Propionate  
222 (FP)]

223 Group 2 (n=5 mice): 10 mg.kg<sup>-1</sup> LPS alone

224 Group 3 (n=5 mice): 1000 mg.kg<sup>-1</sup> Bignay *plus* 10 mg.kg<sup>-1</sup> LPS

225 Group 4 (n=5 mice): 10<sup>-7</sup> M FP *plus* 10 mg.kg<sup>-1</sup> LPS

226 The 1000 mg.kg<sup>-1</sup> dose of Bignay was chosen because previous reports  
227 have shown that 1000 mg.kg<sup>-1</sup> Bignay had no effect in different organs after acute  
228 oral toxicity study (OECD 423) in mice *in vivo* (Japan Association for Laboratory  
229 Animal Science Conference, May 2017:Fukushima, Japan). Preliminary studies  
230 have demonstrated that no animals died at the highest dose (2000 mg.kg<sup>-1</sup>), thus  
231 suggesting that this is an indicative of LD<sub>50</sub> are greater than 2000 mg.kg<sup>-1</sup>. The 10  
232 mg.kg<sup>-1</sup> dose of LPS was used which was shown to cause ALI and neutrophilic  
233 inflammation in mice *in vivo* [35]. Fluticasone Propionate (10<sup>-7</sup> M FP), a class of

234 drug known as corticosteroids, was used as reference drug for all subsequent *in*  
235 *vivo* experiments [42-45]. This dosage is based on previous studies that  
236 demonstrated reduction of secreted airway mediators [35].

237 The vehicle control (distilled water) or 10 mg.kg<sup>-1</sup> LPS was instilled  
238 intratracheally into anesthetized mice. Twenty-four hrs later, mice were  
239 anesthetized with combination of dexmedetomidine (Precedex; 100 µg.mL<sup>-1</sup>) and  
240 ketamine (100 mg.mL<sup>-1</sup>) via intraperitoneal injection. A total of 1 mL x 3 PBS was  
241 slowly infused into the lung and bronchoalveolar lavage fluid (BALF) was collected  
242 by gentle aspiration. After centrifugation (12,000g x 5 min), the supernatant was  
243 saved and was stored for later determination of secreted IL-6 and total lung protein  
244 content. The cell pellet was resuspended in PBS, and the total lung inflammatory  
245 cells were counted manually using Neubauer hemocytometer (Fisher Scientific  
246 USA).

## 247 248 **Measurement of Total Lung Protein**

249 The total lung protein in BALF was measured using the Bradford Reagent Kit  
250 [SigmaAldrich Chemical (Chemline Scientific, Philippines)]. In the PBS buffer,  
251 bovine serum albumin used as standard (62.5–1,400 µg.mL<sup>-1</sup>), was prepared. In  
252 the 96-microplate well, 100 µL supernatant or cell lysate samples and 100 µL of  
253 protein standard were separately added; blank wells have PBS buffer alone. 100  
254 µL of Bradford Reagent was applied to each well and incubated for 5 min. The  
255 samples were measured at a 595 nm absorption rate. By comparing the net

256 absorbance values against the standard curve, the protein concentration of the  
257 unknown samples was calculated.

### 258 **Quantitation of secreted IL-6**

259 Supernatant obtained from the BALF was used to measure the endogenous  
260 release of IL-6 using a commercially available Murine IL-6 ELISA kit according to  
261 the manufacturer's instructions (ThermoFisher, Invitrogen). The absorbance was  
262 read at 450 nm and secreted IL-6 was analyzed using Gen5 data analysis software  
263 (BioTek Instruments, Inc.). The minimum detectable dose of IL-6 is  $<2 \text{ pg.mL}^{-1}$ . All  
264 data are expressed in  $\text{pg.mL}^{-1}$ .

### 265 **Determination of lung wet:dry ratio**

266 In separate experiments, treated mice as above were euthanized, chest was  
267 opened and lungs were excised. Each lung was blotted off, weighed and placed in an  
268 oven set at  $50^{\circ}\text{C}$  for 48 hours to achieve dry weight. The wet:dry ratio was  
269 calculated to assess lung edema formation caused by LPS in the presence or  
270 absence of either vehicle control, Bignay or FP.

271 In another set of experiments, treated lungs were fixed by gentle injection of  
272 4% buffered paraformaldehyde into the tracheal cannula at a pressure of 20 cm  
273  $\text{H}_2\text{O}$ . The excised lung was immersed in 4% paraformaldehyde solution for 24 hrs.  
274 The inferior lobe of right lungs were sectioned sagittally, embedded in paraffin, cut

275 into 5  $\mu\text{m}$  sections, and stained with hematoxylin and eosin (H&E) for  
276 morphological examination.

## 277 **Evaluation of acute pulmonary vascular leakage**

278 To examine whether LPS causes pulmonary vascular leakage, Evans blue dye  
279 was injected into tail vein in all treated mice. Evans blue is an azo alkaline stain  
280 that has a high affinity for serum albumin [46]. This dye is used as an *in vivo*  
281 marker to examine the LPS-induced vascular permeability of lung damage. All  
282 animals received Evans blue dye but lungs were not infused with PBS (no BAL).

283 Experimental interventions: Mice were selected randomly.

284 Group 5 (n=5 mice): vehicle control [no LPS, no Bignay, no Fluticasone  
285 Propionate (FP)]

286 Group 6 (n=5 mice): 10 mg.kg<sup>-1</sup> LPS alone

287 Group 7 (n=5 mice): 1000 mg.kg<sup>-1</sup> Bignay *plus* 10 mg.kg<sup>-1</sup> LPS

288 Group 8 (n=5 mice): 10<sup>-7</sup> M FP *plus* 10 mg.kg<sup>-1</sup> LPS

289 At the end of experimental period, mice were sacrificed 24 hrs after treatment.

290 Lung samples were collected for actual visible coloration analysis.

## 291 **Statistical Analysis**

292 Measured data were presented as mean  $\pm$  standard error of the mean (SEM).

293 Different treatments were analyzed by Student's *t-test* for analysis of significant

294 differences between two groups. The use of ANOVA with Tukey test was used to

295 test for population mean differences; mean of all animals treated with Bignay,  
296 mean of all animals treated with FP, which is considered to be the best available  
297 method in cases where confidence intervals are required. In comparison of three or  
298 more groups, Tukey method was used as *post hoc* test regarding  $p < 0.05$  as  
299 significant after analysis of variance (ANOVA). GraphPad Prism Software 9.0  
300 (GraphPad, San Diego, CA) was used for all analyses.

301

## 302 **Results**

### 303 **Quantitative analysis of heavy metals**

304 The amounts of Lead (Pb) and Cadmium (Cd) were both undetected (Table 1),  
305 measured by the Philippine Accredited Institute of Pure and Applied Chemistry  
306 using AAS. Our results indicated that in processed and stored samples, the Bignay  
307 fruit extracts have no trace of heavy metals. The permissive limit and limit of  
308 detection are shown in Table 1.

309 Table 1. Analysis of Heavy Metals from Dried Bignay Samples by Atomic  
310 Absorption Spectroscopy (AAS)

| Parameters                     | Lead (Pb)                       | Cadmium (Cd)                    |
|--------------------------------|---------------------------------|---------------------------------|
| Results                        | Not detected                    | Not detected                    |
| Permissible limits             | 0.01 mg.L <sup>-1</sup>         | 0.003 mg.L <sup>-1</sup>        |
| Reference Standard             | SM 3113B<br>(Electrothemat AAS) | SM 3113B<br>(Electrothemat AAS) |
| Methods of Detection<br>Limits | 0.002 mg.L <sup>-1</sup>        | 0.00009 mg.L <sup>-1</sup>      |

311 The content of heavy metals, Lead (Pb) and Cadmium (Cd)  
312 were both undetected as analyzed by AAS. The permissive  
313 limits and limit of detection are shown.  
314

### 315 **Analysis of Aflatoxins**

316 Aflatoxin exposure through food can result in serious health complications and  
317 consequences. We observed that the content of total aflatoxins and aflatoxins are



318 below the stipulated limit as reported in the Guidelines of the Registration of Herbal

319 Medicines of Department of Health.

320 Table 2. Analysis of Total Aflatoxin and Aflatoxin B1 (n=3 trials)

| Trial Number | Total Aflatoxin (ppb) | Aflatoxin B1 (ppb) |
|--------------|-----------------------|--------------------|
| 1            | 13.26                 | 4.27               |
| 2            | 12.33                 | 5.16               |
| 3            | 12.64                 | 4.49               |
| Average      | 12.75 ± 0.47          | 4.64 ± 0.46        |

321

### 322 **Quantitation of polyphenols, phytosterols and flavonoids**

323 The total phenolic quantity of extracted Bignay fruit was  $20.4 \pm 0.2$  mg GA  
324 equivalent/gram ( $p < 0.01$  vs. control of the vehicle). The reference medicinal plant,  
325 Lagundi yielded  $8.0 \pm 2.0$  mg GA equivalent/g extract, which was ~ 60 percent  
326 lower than Bignay ( $p < 0.05$  vs. Bignay). Lagundi was used because it is known to  
327 have significant active secondary metabolites and anti-inflammatory property [47].

328 The content of total phytosterol in Bignay fruit extracts was  $33.0 \pm 7.0$  mg  
329 cholesterol equivalent/gram extract . The phytosterol content of Bignay was also  
330 found to be ~3-fold higher than that of Lagundi, detecting just  $10.1 \pm 2.0$  mg  
331 cholesterol equivalent/g extract ( $p < 0.05$ ; Bignay vs. Lagundi).

332 Bignay's total flavonoid level was  $12.2 \pm 4.0$  mg quercetin equivalent/g  
333 extract. The normal reference Lagundi flavonoid was comparable to the Bignay  
334 ethanolic extract (p=NS).

## 335 **Indices of LPS-induced ALI: effect of Bignay and FP**

### 336 **Total Lung Cell Number**

337 The total number of lung cells from vehicle control was  $105,000 \pm 70,000$   
338 and increased to  $3,073,000 \pm 510,420$  cells (p<0.0003 vs. vehicle control after  
339 administration of LPS alone (Fig 2). The overall lung cell count was attenuated by  
340 treatment with 1000 mg.kg<sup>-1</sup> extracted Bignay fruits to  $1,230,170 \pm 292,700$  cells  
341 (p<0.001 vs LPS alone). The protective effect of Bignay+LPS in inhibiting the total  
342 lung cell number caused by LPS was less efficient when compared to FP+LPS  
343 (p<0.002). ALI induced by LPS was blocked to near baseline with FP+LPS  
344 (p<0.001 vs LPS alone, no Bignay).

345

346 **Fig 2. Total cell count obtained from bronchoalveolar lavage fluid (BALF;**  
347 **n=5 mice/group of either sex).** Administration of LPS caused increased in total  
348 lung cell count and was >70% blocked with extracted *Antidesma bunius* (L.)  
349 Spreng [Bignay]. Fluticasone Propionate (FP) was used as reference drug and  
350 known to block the cell migration to the site of inflammation. PBS is the vehicle  
351 control used in this study. Total cell count was determined manually by using the

352 hemocytometer. Where significant differences were identified, Tukey's test was  
353 used to further examine the differences.

354  $p < 0.0003$ , LPS alone vs. vehicle control;  $p < 0.001$ , B+LPS vs. vehicle control;  
355  $p < 0.01$ , FP+LPS vs. vehicle control;  $p < 0.001$ , LPS alone vs. B+LPS;  $p < 0.001$ , LPS  
356 alone vs. FP+LPS;  $p < 0.002$ , B+LPS vs FP+LPS.

### 357 **Total Lung Protein**

358 The total lung protein was measured by Bradford assay ([Fig 3](#)). There was  
359 an increased in total lung protein in mice receiving LPS alone compared to vehicle  
360 treated mice ( $p < 0.01$ , LPS vs vehicle control). An ~50% reduction of total lung  
361 protein caused by LPS stimulation was demonstrated from animals receiving  
362 Bignay extract ( $p < 0.05$  vs LPS alone, no Bignay) while FP elicited <30% inhibition  
363 from stimulated value of LPS. Importantly, we observed that Bignay is apparently  
364 more effective than FP in inhibiting the total lung protein.

365

366 **Fig 3. Total Lung Protein Content. LPS-induced acute lung injury increased**  
367 **total lung protein ( $\mu\text{g}\cdot\text{mL}^{-1}$ ) in 5 experimental mice.** LPS caused a marked  
368 increase in total lung protein obtained from BALF. Bignay and Fluticasone  
369 Propionate (FP) inhibited minimally the protein content obtained from BALF when  
370 compared with LPS alone. Where significant differences were identified, Tukey's  
371 test was used to further examine the differences.

372  $p < 0.01$ , LPS alone vs. vehicle control;  $p < 0.001$ , B+LPS vs. vehicle control;  $p < 0.01$ ,

373 FP+LPS vs. vehicle control;  $p < 0.05$ , LPS alone vs. B+LPS;  $p < 0.05$ , LPS alone vs.

374 FP+LPS;  $p = \text{NS}$ , B+LPS vs FP+LPS.

375

### 376 **Secretion of IL-6**

377 IL-6 is one of the biomarkers of ALI [5,7,8]. Administration of LPS caused

378 substantial secretion of IL-6 as compared to baseline value (Fig 4). Extracted

379 Bignay fruits inhibited the secreted IL-6 by ~55% from LPS and was reproducible

380 for all treated mice. Similarly, we observed that the inhibitory effect of synthetic

381 corticosteroid, FP, was as effective as Bignay in blocking the release of IL-6. Our

382 data indicate that Bignay could mimic the protective effect of FP in reduction of

383 LPS-induced ALI.

384

385 **Fig 4. Blockade of LPS-induced endogenous secreted IL-6 by *Antidesma***

386 ***bunius* (L.) Spreng [Bignay]**. Administration of LPS caused increased secretion

387 of IL-6 compared to vehicle control treated mice. Treatment with  $1000 \text{ mg.kg}^{-1}$

388 Bignay and  $10^{-7} \text{ M}$  Fluticasone Propionate (FP) attenuated equally the secreted IL-

389 6 caused by LPS stimulation. Concentration IL-6 in the BALF was measured using

390 the IL-6 Mouse ELISA kit. Measurements are mean  $\pm$  SEM, and expressed as

391 picogram per milliliter ( $\text{pg.mL}^{-1}$ ). Where significant differences were identified,

392 Tukey's test was used to further examine the differences.

393  $p < 0.05$ , LPS alone vs. vehicle control;  $p = \text{NS}$ , B+LPS vs. vehicle control;  $p = \text{NS}$ ,

394 FP+LPS vs. vehicle control;  $p < 0.05$ , LPS alone vs. B+LPS;  $p < 0.02$ , LPS alone vs.

395 FP+LPS;  $p < 0.01$ , B+LPS vs FP+LPS.

396

### 397 **Wet:Dry ratio**

398 Lung wet to dry ratios were measured in separate treated mice. These  
399 treated animals were not subjected to lung lavage. In vehicle control treated mice,  
400 the weight of the lung was  $3.5 \pm 0.4$  g and increased to  $6.8 \pm 1.2$  g following LPS  
401 treatment ( $p < 0.05$ ). The lung W/D ratio decreased to  $5.2 \pm 1.1$  g for mice receiving  
402 Bignay but was not statistically different from LPS treated mice ( $p = \text{NS}$ ). However,  
403 the blockade caused by FP was near the baseline value ( $p < 0.05$  vs LPS alone).

### 404 **Airway inflammatory cell lung infiltration**

405 LPS caused inflammatory cell infiltration in the lung interstitium, surrounding  
406 the airways and pulmonary blood vessels ([Fig 5B](#)) compared to vehicle control  
407 treated mice ([Fig 5A](#)). A marked reduction of migrated cells to the site of  
408 inflammation caused by LPS stimulation was reduced by  $1000 \text{ mg.kg}^{-1}$  Bignay ([Fig](#)  
409 [5C](#)). Bignay was as effective as FP in reduction of cell infiltrate ([Fig 5D](#))  
410 suggesting that Bignay could be a good candidate in protecting the migration of  
411 inflammatory cells to the site of inflammation.

412 **Fig 5. Infiltration of inflammatory cells after instillation of LPS.** Representative  
413 microsectioned of airways and lung parenchyma for histologic assessment of  
414 cellular infiltration of inflammatory cells. Airway inflammation was analyzed after  
415 staining the lung with hematoxylin and eosin dye. (A). Vehicle control showed

416 normal appearance of the airway and lung parenchyma with minimal inflammatory  
417 cells in lung tissue (B). LPS-induced ALI caused accumulation of inflammatory  
418 cells surrounding the airways and within epithelium (see black arrow). (C).  
419 Treatment with 1000 mg.kg<sup>-1</sup> *Antidesma bunius* (L.) Spreng [Bignay] caused  
420 reduction of migrated inflammatory cells in the airway that is comparable with  
421 vehicle control mice (control). (D). Administration of Fluticasone Propionate (FP)  
422 also caused reduction of cell migration caused by LPS stimulation. Light  
423 microscopic magnification was set at X60 pixel.

#### 424 **Pulmonary Vascular Leak**

425       Lastly, we examined the effect of Bignay fruit extracts on the pulmonary  
426 vascular permeability caused by LPS. Injection of Evans Blue dye [46] into the tail  
427 vein caused severe blue coloration of the lungs 2 hrs after administration of LPS,  
428 signaling the induction of vascular leakage. In the vehicle control-treated mice, the  
429 appearance of lung remained pinkish in color ([Fig 6A](#)), but in LPS-induced acute  
430 lung injury, blue coloration of the lung was evident 2 hrs later ([Fig 6B](#)). In animals  
431 with 500 mg.kg<sup>-1</sup> Bignay extract, there was a minimal blockade of vascular leak  
432 ([Fig 6C](#)). Increasing the dose of Bignay to 1000 mg.kg<sup>-1</sup> substantially blocked the  
433 vascular leakage caused by LPS ([Fig 6D](#)); Bignay was as effective as FP ([Fig 6E](#)).  
434 These data provide preparatory evidence for Bignay's role, like FP, in blocking the  
435 LPS-induced pulmonary vascular leak.

436 **Fig 6. Assessment of Lung Vascular Leak.** Evans Blue Dye is a known dye for  
437 assessing lung damage caused by LPS in mice. (A) vehicle control treated mice;  
438 (B) The blue coloration of lung indicates the vascular leak by LPS. Pretreatment of  
439 mice with 500 mg.kg<sup>-1</sup> Bignay (C) caused minimal effect in preventing vascular  
440 leak, however, administration of 1000 mg.kg<sup>-1</sup> Bignay (D) via *i.p.* injection  
441 substantially prevented the vascular leak caused by LPS stimulation. The positive  
442 reference drug (E), Fluticasone Propionate (FP), protected the effect of LPS in  
443 induction of acute lung injury. The effect of *Antidesma bunius* (L.) Spreng [Bignay]  
444 is as effective as FP.

445

## 446 **Discussion**

447           Philippine berries play an important role in inflammatory disease control  
448 [9,10,21-24,26]. The objective of this study is to investigate the protective and  
449 toxicological effects of the ethanolic extract of *Antidesma bunius* (L.) Spreng  
450 [Bignay] fruit (Fig 1) on biomarkers of ALI caused by LPS and compared with  
451 Fluticasone Propionate, a synthetic steroid of the glucocorticoid drug family.

452           We first analyzed the amount of heavy metals (Table 1) as well as total  
453 aflatoxins and aflatoxins B1 (Table 2) to ensure that unwanted substances are not  
454 present in the Bignay fruit extracts, According to the Philippine Accredited Institute  
455 of Pure and Applied Chemistry, Bignay samples have insignificant trace of heavy  
456 metals. Another findings showed that in the Guidelines on the Registration of  
457 Herbal Medicines of the Department of Health, total aflatoxins and aflatoxins B1  
458 were below the limit stipulated. The samples used in these analyses are then  
459 recommended to provide evidence that Bignay is safe (Table 1 and Table 2) for  
460 use in laboratory animals and likely, in humans.

461           The flavonoid, phenolic, and steroid contents of ethanolic Bignay fruit  
462 extracts were next quantified. Flavonoids exemplify the most widely distributed  
463 group of plant phenolics and are abundant in foods [27,28]. It has been reported  
464 that flavonoids are particularly beneficial, acting as antioxidants and providing  
465 protection against various inflammatory diseases [27,28,48,49]. While phenolics  
466 account for the majority of antioxidant activity in plants or plant products, they are



467 the largest group of phytochemicals [28,38,48,50]. In patients with cardiovascular  
468 disease, a type of inflammatory disease, plant sterols have the potential to block  
469 dietary cholesterol absorption. With these results, it could be postulated that  
470 Bignay fruits could play an important role in radical scavenging and can therefore  
471 be considered as beneficial plant species for natural antioxidant sources with  
472 potential use for the treatment of many life-threatening inflammatory diseases.

473         It is likely that the inhibition of LPS-induced ALI could be attributed to the  
474 active secondary metabolites, phenols, flavonoids, and steroids, measured in  
475 Bignay fruit extracts. Nevertheless, the different functions of these metabolites are  
476 not well understood yet. The effects of natural herbal compounds in inflammatory  
477 cell infiltration have previously been demonstrated in the murine asthma model  
478 [51,52]. The *Boerhavia procumbens* methanolic extract showed a decrease in the  
479 number of eosinophils and T-cells in toluene diisocyanate lung exposed rats [52].  
480 *Octimum gratisimum*, a widely used folk medicine in Brazil, induced a decrease in  
481 airway inflammation and development of cytokines in allergic mice [51]. In addition,  
482 treatment with flavonoid quercetin in immunized mice also reduced the number of  
483 inflammatory cells and lung homogenate cytokine levels [50].

484         Using the murine model of LPS-induced ALI, we demonstrated that  
485 administration of LPS increased: a) lung inflammatory cell number ([Fig 2](#)), b) total  
486 lung protein content ([Fig 3](#)), c) wet to dry ratio, d) endogenously secreted IL-6 from  
487 BALF ([Fig 4](#)), e) airway inflammation ([Fig 5](#)) and f) pulmonary vascular leak ([Fig 6](#)).

488 Administration of Bignay fruit extracts and FP was apparently, equally effective in  
489 preventing the LPS-induced ALI (Figs 2,3,4,5) and pulmonary vascular leakage  
490 (Fig 6). The use of ANOVA with Tukey test was used to test for population mean  
491 differences; mean of all animals treated with Bignay, mean of all animals treated  
492 with FP, which is considered to be the best available method in cases where  
493 confidence intervals are required. We noticed that there was no statistical  
494 significance when Bignay+LPS was compared to FP+LPS [Figures 3-4]; however,  
495 the protective effect of FP differed from Bignay in the number of total lung cell [Fig  
496 2], suggesting that FP is more efficacious than Bignay in preventing airway  
497 inflammation.

498 LPS administration increased the number of inflammatory cells migrating  
499 into the lungs (Fig 2) and the overall BALF protein content of the lungs (Fig 3). In  
500 blocking these responses, the protective effect of extracted Bignay with a high  
501 amount of quercetin (flavonoid content) in the extracts is comparable to FP. In  
502 addition, it is evident that Bignay's anti-inflammatory properties are linked to the  
503 combination of phenols, steroids and flavonoids, which are considered to have  
504 anti-oxidant and anti-inflammatory properties. Previous studies have shown that  
505 components of flavonoids and phenolic acids play a significant role in cancer and  
506 other human inflammatory disease regulation [48,53].

507 Airway pro-inflammatory mediators such as secreted cytokines have been  
508 well known to lead to persistent chronic airway inflammation and airway

509 remodeling [4,5,7,8]. Previous studies have shown that FP has significantly  
510 suppressed secreted interleukins [42,43-45]. Here, the protective effect of the  
511 natural Bignay fruit extract is as effective as FP in inhibiting the release of IL-6 in  
512 animals receiving LPS ( $p < 0.05$  vs LPS alone; Fig 4), indicating that Bignay could  
513 also play a significant modulatory role in preventing the remodeling phase of the  
514 airway as IL-6 is one of the ALI mediators.

515         The lung wet-to-dry (W/D) weight ratio was used as an index of lung water  
516 accumulation after the instillation of LPS. As a result, the rise in lung edema  
517 following LPS instillation was a combination of an inflammatory response and a  
518 disruption in fluid exchange, both of which are caused by extracellular LPS's direct  
519 action. Unlike FP, the administration of Bignay, did not differ significantly in  
520 blocking the formation of lung edema but may presumably be sufficient to block  
521 lung edema caused by LPS in longer period of treatment.

522         As observed in essential structural changes in lung morphology, LPS  
523 caused lung damage (Fig 5). Increases in airway smooth muscle thickness  
524 (hypertrophy) and epithelial cell denudation were evident in H&E stained tissues.  
525 However, after treatment with either Bignay fruit extract or FP, the alteration in lung  
526 morphology returned to near normal structural appearance; this is an indication  
527 that Bignay fruit extract could prevent the process of airway remodeling in murine  
528 model of ALI. Herbal formula has been shown to reduce cell infiltration in the lungs  
529 and secretion of TNF $\alpha$  and IL-6 in an emphysema-induced model of elastase plus

530 LPS [54]. In this regards, previous studies have shown that not only can herbal  
531 medicine suppressed BALF inflammatory cells, but also cytokine levels and airway  
532 remodeling. The influence of the traditional medicinal product *Callicarpa japonica*  
533 on the prevention of inflammatory diseases reduced neutrophil influx and IL-6  
534 production in the cigarette smoke model (COPD) supported these findings [55-57].

535 ALI/ARDS animal models have been used as features to help understand  
536 the pathogenesis of this lung disease, in particular the evaluation of vascular  
537 permeability after lung damage induction. In mice acutely exposed to LPS, Dudek  
538 *et al.* showed that neutralizing mAb treatment directed against Group V  
539 Phospholipase A<sub>2</sub> (57) reduced inflammatory activities of the airway mediated in  
540 part by neutrophilic infiltration with alteration of F-actin assembly and gap junction,  
541 VE-Cadherin [36]. To date, no studies have tested the preventive effects of  
542 medicinal plants in murine model of LPS-induced ALI/ARDS *in vivo*. This research  
543 is the first demonstration to compare the anti-inflammatory efficacy of Bignay fruit  
544 extract with Fluticasone Propionate (FP) in blocking ALI induced by LPS (Fig 7).

545 The beneficial properties of Bignay have been anecdotally recognized and  
546 have developed a powerful suppressive effect on inflammatory diseases, whereas  
547 FP belongs to a class of drugs known as corticosteroids and is used for the long-  
548 term treatment of upper and lower airway diseases such as asthma and COPD  
549 [42-45]. In this study, both Bignay and FP have been shown to be similarly  
550 successful and well tolerated by LPS-treated mice (Fig. 2-4), indicating that Bignay

551 fruit extract, free of pollutants and heavy metals, could be converted into a healthy,  
552 clinically based herbal drug. In the end, Bignay would be able to increase local  
553 livelihood of farmers and would provide a fair, protected and reliable herbal anti-  
554 inflammatory medicine for a variety of inflammatory diseases.

555         It is important to note some limitations of our findings. Although our findings  
556 showed preventive and non-toxic effects of Bignay fruit extracts in LPS-induced  
557 ALI *in vivo*, our results are focused on an ALI murine model. At least to our  
558 knowledge, we have evaluated the effects of Bignay extracts in the murine model  
559 of ALI, but not all ALI indices have been evaluated. However, the mechanisms  
560 involved in inhibiting ALI triggered by LPS stimulation have been partly established.  
561 In addition, the isolation or structural formula of active compounds in Bignay was  
562 not included in this analysis, but biochemical compound recognition plus the anti-  
563 inflammatory activity of the three secondary metabolites were quantified. Although  
564 the content of total aflatoxins and aflatoxin B1 were determined, the source of  
565 *Aspergillus Flavus* and *Apergillus parasiticus* were not identified in this study.  
566 Histological airway analysis is close to that of humans with ALI; our data in mice,  
567 however, cannot be explicitly extrapolated to the human state.

568         As for ALI in humans, therapy does not confer therapeutic effectiveness  
569 after significant histological changes occur. Although the blocking effects on ALI  
570 production in this study are relatively short, a hyper-acute model of ALI is the  
571 model used here, eliciting a rapid response after LPS infusion. By contrast, in

572 humans, ALI typically grows over a considerably longer period (hrs to days), as in a  
573 cumulative rather than square wave fashion, the inciting stimulus likely causes lung  
574 injury. Therefore, the demonstration that Bignay administered pre-LPS is  
575 successful in abolishing or altering ALI in mice for up to 2 hrs indicates the  
576 likelihood of a longer window for intervention in the more chronic human production  
577 of ALI. This depends, of course, on the degree to which the results in this study  
578 translate into the human situation. It is also presumed that until ALI is fully  
579 manifested, this therapy is probably helpful.

580       We also observed that complete blockade of ALI caused by Bignay is not all  
581 done in treated mice. Nonetheless, with 1000 mg.kg<sup>-1</sup> Bignay, a significant or near  
582 complete reduction of the impact of LPS on ALI can be induced, especially in the  
583 reduction of vascular leakage caused by LPS stimulation (Fig 6). This blocking  
584 effect is as efficient as FP in LPS-induced ALI/ARDS in mice, indicating that Bignay  
585 is highly likely, could prevent the development of ALI/vascular leakage caused by  
586 bacterial soluble factor such as LPS.

587

## 588 **Conclusion**

589           Our research is the first demonstration that the inhibition by *Antidesma*  
590 *bunius* (L.) Spreng fruit extracts of LPS-induced ALI is as effective in mice *in vivo*  
591 as Fluticasone Propionate (FP), a corticosteroid. Figure 7 represents the schematic  
592 diagram comparing Bignay's and FP's physiognomies and preventive effects on  
593 LPS-induced ALI. Treatment with either Bignay or FP resulted in a substantial  
594 reduction in the number of lung inflammatory cells, lung protein content, lung  
595 edema, and vascular pulmonary leakage caused by LPS. Most importantly, we  
596 demonstrated that secreted IL-6, one of the biomarkers of ALI, was inhibited by  
597 Bignay fruit extract; Bignay's inhibitory effect on secreted IL-6 was only ~55%, but  
598 comparable to FP.

599           In accordance with these findings, in the presence of Bignay or FP in treated  
600 mice, a substantial reduction in vascular leakage was achieved. The precise  
601 mechanism by which Bignay modulates ALI, unlike in previous FP studies, is  
602 unknown, but it is possible that Bignay's ability to attenuate ALI and vascular leak  
603 indices can be explained, at least in part, by our new findings. The quantified  
604 phenols, phytosterols and flavonoids showed contributory or synergistic inhibitory  
605 effects on LPS-induced ALI biomarkers. Collectively, Bignay may provide a  
606 therapeutic strategy for human ALI regulation that may be useful for new drug  
607 discovery with reduced side effects in inflammatory conditions. The prevention of  
608 ALI in humans by Bignay remains further investigations, e.g., clinical trials.

## 609 **Acknowledgments**

610 We are grateful for the access of the animal laboratory facility to the College of  
611 Veterinary Medicine, Cagayan State University and R&B Facility, St. Luke's  
612 Medical Center, Philippines. The writers are thankful for the support and critical  
613 analysis of the manuscript by Professor Urdujah Gaerlan Alvarado, Professor Kozo  
614 Watanabe, Dr. Brigido L. Carandang Jr., Dr. Swapan Chatterjee and Dr. Charina  
615 de Silva. Authors would also like to acknowledge the assistance provided in the  
616 H&E staining of the lung tissue parts by the Department of Histopathology at  
617 Cagayan State University; we are grateful to JL, KSHB, RCD and JILR, who during  
618 the research time took care of the mice and their assistance in conducting the  
619 experiments.

## 620 **Author Contributions**

621 Conceptualization: Maria Nilda M. Muñoz, Kozo Watanabe

622 Data curation: Maria Nilda M. Muñoz, Kozo Watanabe, Swapan Chatterjee

623 Funding acquisition: Maria Nilda M. Muñoz, Jennifer Lucero, Urdujah Gaerlan  
624 Alvarado,

625 Investigation: Maria Nilda M. Muñoz, Urdujah Gaerlan Alvarado, Kozo Watanabe

626 Methodology: Maria Nilda M. Muñoz, Charina de Silva, Jennifer Lucero, Kimberly  
627 Stacy Hope Benzon, Reuel C. Delicana, Jerica Isabel L. Reyes

628 Project administration: Maria Nilda M. Muñoz, Urdujah Gaerlan Alvarado, Kozo



629 Watanabe

630 Writing – original draft: Maria Nilda M. Muñoz

631 Writing – review & editing: Maria Nilda M. Muñoz, Kozo Watanabe, Swapan

632 Chatterjee

633

634

## 635 **References**

- 636 1. Bernard GR, Artigas A, Brigham KL, Carlet J, Falke K, Hudson L, et al. The  
637 American-European Consensus Conference on ARDS. Definitions,  
638 mechanisms, relevant outcomes, and clinical trial coordination. *Am J Respir*  
639 *Crit Care Med.* 1994;149: 818–824. [doi:10.1164/ajrccm.149.3.7509706](https://doi.org/10.1164/ajrccm.149.3.7509706).
- 640 2. Bazzoni G, Dejana E. Endothelial cell-to-cell junctions: molecular  
641 organization and role in vascular homeostasis. *Physiol Rev.* 2004;84: 869–  
642 901. [doi:10.1152/physrev.00035.2003](https://doi.org/10.1152/physrev.00035.2003).
- 643 3. Bazzoni G, Dejana E. Endothelial cell-to-cell junctions: molecular  
644 organization and role in vascular homeostasis. *Physiol Rev.* 2004;84: 869–  
645 901. [doi:10.1152/physrev.00035.2003](https://doi.org/10.1152/physrev.00035.2003).
- 646 4. Ware LB, Matthay MA. The acute respiratory distress syndrome. *N Engl J*  
647 *Med.* 2000;342: 1334–1349. [doi:10.1056/NEJM200005043421806](https://doi.org/10.1056/NEJM200005043421806).
- 648 5. Barnes PJ. The cytokine network in asthma and chronic obstructive  
649 pulmonary disease. *J Clin Invest.* 2008;118: 3546–3556.  
650 [doi:10.1172/JCI36130](https://doi.org/10.1172/JCI36130).
- 651 6. Kim DK, Fukuda T, Thompson BT, Cockrill B, Hales C, Bonventre JV.  
652 Bronchoalveolar lavage fluid phospholipase A2 activities are increased in  
653 human adult respiratory distress syndrome. *Am J of Physiol-Lung Cellular*  
654 *and Mol Physiol.* 1995;269: L109–L118.  
655 [doi:10.1152/ajplung.1995.269.1.L109](https://doi.org/10.1152/ajplung.1995.269.1.L109).

- 656 7. Matute-Bello G, Frevert CW, Martin TR. Animal models of acute lung injury.  
657 Am J Physiol Lung Cell Mol Physiol. 2008;295: L379-399.  
658 [doi:10.1152/ajplung.00010.2008](https://doi.org/10.1152/ajplung.00010.2008).
- 659 8. Matute-Bello G, Downey G, Moore BB, Groshong SD, Matthay MA, Slutsky  
660 AS, et al. An official American Thoracic Society workshop report: features  
661 and measurements of experimental acute lung injury in animals. Am J  
662 Respir Cell Mol Biol. 2011;44: 725–738. [doi:10.1165/rcmb.2009-0210ST](https://doi.org/10.1165/rcmb.2009-0210ST).
- 663 9. Lim TK. Edible Medicinal And Non-Medicinal Plants: Volume 5, Fruits.  
664 Springer Netherlands; 2013. [doi:10.1007/978-94-007-5653-3](https://doi.org/10.1007/978-94-007-5653-3).
- 665 10. Medicine WHOP on T. Legal status of traditional medicine and  
666 complementary/alternative medicine: a worldwide review. World Health  
667 Organization; 2001. <https://apps.who.int/iris/handle/10665/42452>.
- 668 11. Yang R-Y, Lin S, Kuo G. Content and distribution of flavonoids among 91  
669 edible plant species. Asia Pac J Clin Nutr. 2008;17 Suppl 1: 275–279.  
670 PMID: [18296355](https://pubmed.ncbi.nlm.nih.gov/18296355/).
- 671 12. Dewick, P. M. Medicinal natural products. A biosynthetic approach, John  
672 Wiley & Sons England. J Med Chem. 2002.  
673 <https://doi.org/10.1021/jm020128m>
- 674 13. Calahan J, Howard D, Almalki AJ, Gupta MP, Calderón AI. Chemical  
675 Adulterants in Herbal Medicinal Products: A Review. Planta Med. 2016

- 676 Apr;82(6): 505-15. doi: [10.1055/s-0042-103495](https://doi.org/10.1055/s-0042-103495). Epub 2016 Apr 7. PMID:  
677 [27054916](https://pubmed.ncbi.nlm.nih.gov/27054916/).
- 678 14. Parvathy, VA, Swetha, VP, Sheeja , TE, Sasikumar, B. Detection of plant-  
679 based adulterants in turmeric powder using DNA barcoding, *Pharmaceutical*  
680 *Biology*. 2015. 53:12,1774-1779, doi:[10.3109/13880209.2015.1005756](https://doi.org/10.3109/13880209.2015.1005756)
- 681 15. Akram S, Najam R, Rizwani GH, Abbas SA. Determination of heavy metal  
682 contents by atomic absorption spectroscopy (AAS) in some medicinal plants  
683 from Pakistani and Malaysian origin. *Pak J Pharm Sci*. 2015 Sep;28(5):  
684 1781-1787. PMID: [26408897](https://pubmed.ncbi.nlm.nih.gov/26408897/).
- 685 16. Sisay B, Debebe E, Meresa A, et al. Analysis of cadmium and lead using  
686 atomic absorption spectrophotometer in roadside soils of jimma town. *J Anal*  
687 *Pharm Res*. 2019;8(4): 144-147. doi: [10.15406/japlr.2019.08.00329](https://doi.org/10.15406/japlr.2019.08.00329)
- 688 17. Trucksess MW, Scott PM. Mycotoxins in botanicals and dried fruits: a  
689 review. *Food Addit Contam Part A Chem Anal Control Expo Risk Assess*.  
690 2008 Feb;25(2): 181-192. doi: [10.1080/02652030701567459](https://doi.org/10.1080/02652030701567459). PMID:  
691 [18286408](https://pubmed.ncbi.nlm.nih.gov/18286408/).
- 692 18. Ałtyn I, Twarużek M. Mycotoxin Contamination Concerns of Herbs and  
693 Medicinal Plants. *Toxins (Basel)*. 2020 Mar 14;12(3):182. doi:  
694 [10.3390/toxins12030182](https://doi.org/10.3390/toxins12030182). PMID: [32183391](https://pubmed.ncbi.nlm.nih.gov/32183391/); PMCID: [PMC7150885](https://pubmed.ncbi.nlm.nih.gov/PMC7150885/)..
- 695 19. Chen RS, Tsay JG, Huang YF, Chiou RYY. Polymerase chain reaction  
696 mediated characterization of molds belonging to the *Aspergillus flavus*

- 697 group and detection of *A. parasiticus* in peanut kernels by multiplex  
698 polymerase chain reaction. *J Food Protect.* 2002. 65:840–844.
- 699 20. Gourama H, Bullerman LB. *Aspergillus flavus* and *Aspergillus parasiticus* :  
700 Aflatoxigenic Fungi of Concern in Foods and Feeds † : A Review. *J Food*  
701 *Prot.* 1995 Dec;58(12): 1395-1404. doi: [10.4315/0362-028X-58.12.1395](https://doi.org/10.4315/0362-028X-58.12.1395).  
702 PMID: [31159052](https://pubmed.ncbi.nlm.nih.gov/31159052/).
- 703 21. Henkin RI, Gillis WT. Divergent taste responsiveness to fruit of the tree  
704 *Antidesma bunius*. *Nature.* 1977;265: 536–537. doi:[10.1038/265536a0](https://doi.org/10.1038/265536a0).
- 705 22. Rodda R, Kota A. Investigation on anti-inflammatory property of *Basella*  
706 *Alba linn* leaf extract. *Int J of Pharm and Pahrmac Sci.* 2012;4(1): 452-454.  
707 Corpus ID: [73737282](https://pubmed.ncbi.nlm.nih.gov/73737282/).
- 708 23. Butkhup L, Samappito S. An analysis on flavonoids contents in Mao Luang  
709 fruits of fifteen cultivars (*Antidesma bunius*), grown in northeast Thailand.  
710 *Pak J Biol Sci.* 2008;11: 996–1002. doi:[10.3923/pjbs.2008.996.1002](https://doi.org/10.3923/pjbs.2008.996.1002).
- 711 24. Wilken MK, Satiroff BA. Pilot study of “miracle fruit” to improve food  
712 palatability for patients receiving chemotherapy. *Clin J Oncol Nurs.*  
713 2012;16: E173-177. doi:[10.1188/12.CJON.E173-E177](https://doi.org/10.1188/12.CJON.E173-E177).
- 714 25. Wang Y, Xiang L, Wang C, Tang C, He X. Antidiabetic and antioxidant  
715 effects and phytochemicals of mulberry fruit (*Morus alba* L.) polyphenol  
716 enhanced extract. *PLoS ONE.* 2013;8: e71144.  
717 doi:[10.1371/journal.pone.0071144](https://doi.org/10.1371/journal.pone.0071144).

- 718 26. Butkhup L, Samappito S. Changes in physico-chemical properties,  
719 polyphenol compounds and antiradical activity during development and  
720 ripening of Maoluang (*Antidesma bunius* L. Spreng) fruits. In: undefined  
721 [Internet]. 2011 [cited 24 Sep 2020]. Available: /paper/Changes-in-physico-  
722 chemical-properties%2C-polyphenol-Butkhup-  
723 Samappito/707d370d70f2bf71d261b7ccca9ebdcafd2d3fba.
- 724 27. Butkhup L, Samappito S. Analysis of Anthocyanin, Flavonoids, and  
725 Phenolic Acids in Tropical Bignay Berries. *Int J of Fruit Sci.* 2008; Vol 8:1-2,  
726 15-34. doi:[10.1080/15538360802365913](https://doi.org/10.1080/15538360802365913).
- 727 28. Sulaiman, C. and Indira, B. Total phenolics and total flavonoids in selected  
728 Indian medicinal plants. *Indian J of Pharm Sci.* 2012;74(3): 258 – 260. doi:  
729 [10.4103/0250-474X.106069](https://doi.org/10.4103/0250-474X.106069).
- 730 29. Infante J, Rosalen PL, Lazarini JG, Franchin M, Alencar SMD. Antioxidant  
731 and Anti-Inflammatory Activities of Unexplored Brazilian Native Fruits. *PLoS*  
732 *ONE.* 2016;11(4): e0152974. doi:[10.1371/journal.pone.0152974](https://doi.org/10.1371/journal.pone.0152974).
- 733 30. Du H, Li L, Bennett D, Guo Y, Turnbull I, Yang L, et al. Fresh fruit  
734 consumption in relation to incident diabetes and diabetic vascular  
735 complications: A 7-y prospective study of 0.5 million Chinese adults. *PLoS*  
736 *Med.* 2017;14(4): e1002279. <https://doi.org/10.1371/journal.pmed.1002279>.
- 737 31. Chowtivannakul P, Srichaikul B, Talubmook C. Hypoglycemic and  
738 Hypolipidemic Effects of Seed Extract from *Antidesma bunius* (L.) Spreng in

- 739 Streptozotocin-induced Diabetic Rats. Pak J Biol Sci. 2016;19(5): 211-218.  
740 [doi: 10.3923/pjbs.2016.211.218](https://doi.org/10.3923/pjbs.2016.211.218). PMID: [29023025](https://pubmed.ncbi.nlm.nih.gov/29023025/).
- 741 32. Anand Swarup KR, Sattar MA, Abdullah NA, Abdulla MH, Salman IM,  
742 Rathore HA, et al. Effect of dragon fruit extract on oxidative stress and aortic  
743 stiffness in streptozotocin-induced diabetes in rats. Pharmacognosy  
744 Research. 2010;2(1): 31–35. pmid:[21808536](https://pubmed.ncbi.nlm.nih.gov/21808536/).
- 745 33. Stamy TA. Pathogenesis and treatment of urinary tract infections. Baltimore:  
746 Williams and Wilkins. 1972.
- 747 34. Kassem M, Hashim AN, Hassanein H. Bioactivity of *Antidesma bunius*  
748 leaves (Euphorbiaceae) and their major phenolic constituents. Eur Sci J.  
749 2013;9: 217–228. [doi:10.19044/ESJ.2013.V9N18P%P](https://doi.org/10.19044/ESJ.2013.V9N18P%P). Corpus ID:  
750 [73532490](https://pubmed.ncbi.nlm.nih.gov/73532490/).
- 751 35. Muñoz NM, Meliton AY, Meliton LN, Dudek SM, Leff AR. Secretory group V  
752 phospholipase A2 regulates acute lung injury and neutrophilic inflammation  
753 caused by LPS in mice. Am J Physiol Lung Cell Mol Physiol. 2009  
754 Jun;296(6): L879-L887. [doi:10.1152/ajplung.90580.2008](https://doi.org/10.1152/ajplung.90580.2008).
- 755 36. Dudek SM, Muñoz NM, Desai A Osan CM, Meliton AY, Leff AR. Group V  
756 Phospholipase A<sub>2</sub> Mediates Barrier Disruption of Human Pulmonary  
757 Endothelial Cells Caused by LPS In Vitro. Am J Respir Cell Mol Biol.  
758 2011;44: 361–368. [doi:10.1165/rcmb.2009-0446OC](https://doi.org/10.1165/rcmb.2009-0446OC).

- 759 37. Akinyele IO, Shokunbi OS. Comparative analysis of dry ashing and wet  
760 digestion methods for the determination of trace and heavy metals in food  
761 samples. Food Chem. 2015 Apr 15; 173:682-4.  
762 [doi:10.1016/j.foodchem.2014.10.097](https://doi.org/10.1016/j.foodchem.2014.10.097). Epub 2014 Oct 25. PMID: 25466076.
- 763 38. Singleton, Vernon L.; Orthofer, Rudolf; Lamuela-Raventós, Rosa M.  
764 Analysis of total phenols and other oxidation substrates and antioxidants by  
765 means of folin–ciocalteu reagent. Methods in Enzymology. 1999;299: 152–  
766 178. [doi:10.1016/S0076-6879\(99\)99017-1](https://doi.org/10.1016/S0076-6879(99)99017-1). ISBN 9780121822002.
- 767 39. da Silva LA, Pezzini BR, Soares L. Spectrophotometric determination of the  
768 total flavonoid content in *Ocimum basilicum* L. (Lamiaceae) leaves.  
769 Pharmacogn Mag. 2015;11(41): 96-101. [doi:10.4103/0973-1296.149721](https://doi.org/10.4103/0973-1296.149721).
- 770 40. Nath, M., Chakravorty, M., Chowdhury, S. Liebermann-Burchard Reaction  
771 for Steroids. Nature. 1946;157: 103–104. <https://doi.org/10.1038/157103b0>.
- 772 41. Du Sert P, Hurst N, Ahluwalia A. The ARRIVE guidelines 2.0: Updated  
773 guidelines for reporting animal research. Bio Med Central Vet Res. 2020;16:  
774 242. <https://doi.org/10.1186/s12917-020-02451-y>.
- 775 42. Harding SM. The human pharmacology of fluticasone propionate. Respir  
776 Med. 1990;84 Suppl A: 25–29. [doi:10.1016/s0954-6111\(08\)80004-2](https://doi.org/10.1016/s0954-6111(08)80004-2).
- 777 43. Allen A, Bareille PJ, Rousell VM. Fluticasone furoate, a novel inhaled  
778 corticosteroid, demonstrates prolonged lung absorption kinetics in man



- 779 compared with inhaled fluticasone propionate. Clin Pharmacokinet. 2013;52:  
780 37-42. [doi:10.1007/s40262-012-0021-x](https://doi.org/10.1007/s40262-012-0021-x).
- 781 44. Grossman J, Banov C, Bronsky EA, Nathan RA, Pearlman D, Winder JA,  
782 Ratner PH, Mendelson L, Findlay SR, Kral KM, et al. Fluticasone propionate  
783 aqueous nasal spray is safe and effective for children with seasonal allergic  
784 rhinitis. Pediatrics. 1993;4: 594-9. PMID: [8414833](https://pubmed.ncbi.nlm.nih.gov/8414833/).
- 785 45. Rossios C, To Y, To M, Ito M, Barnes PJ, et al. Long-acting fluticasone  
786 furoate has a superior pharmacological profile to fluticasone propionate in  
787 human respiratory cells. Eur J Pharmacol. 2011;670: 244–51.  
788 [doi:10.1371/journal.pone.0093754](https://doi.org/10.1371/journal.pone.0093754).
- 789 46. Nidavani RB, Mahalakshmi AM, Shalavadi M. Vascular permeability and  
790 Evans blue dye: a physiological and pharmacological approach. J of App  
791 Pharmaceutical Sci. 2014;11: 106-113. [doi:10.7324/JAPS.2014.41119](https://doi.org/10.7324/JAPS.2014.41119).
- 792 47. Olivar JEC, Alaba JPEP, Atienza JFM, Tan J, Umali MT, Alejandro GD.  
793 Establishment of a standard reference material (SRM) herbal DNA barcode  
794 library of *Vitex negundo* L. (lagundi) for quality control measures. Food  
795 additives & contaminants Part A, Chemistry, analysis, control, exposure &  
796 risk assessment. 2016. [doi:10.1080/19440049.2016.1166525](https://doi.org/10.1080/19440049.2016.1166525).
- 797 48. Manthey JA, Grohmann K, Guthrie N 2001. Biological properties of  
798 citrus flavonoids pertaining to cancer and inflammation. Curr. Med. Chem.  
799 2001;8:135-153.

- 800 49. Harborne. J. B. The Flavonoids: 1988. Advances in research since 1980,  
801 Chapman and Hall Ltd, New York. 121.
- 802 50. Lesjak M, Beara I, Simin N, Pintać D, Majkić T, Bekvalac K, et al.  
803 Antioxidant and anti-inflammatory activities of quercetin and its derivatives. J  
804 of Functional Foods. 2018;40: 68–75. doi:10.1016/j.jff.2017.10.047.
- 805 51. Costa RS, Carneiro TCB, Cerqueira-Lima AT, Queiroz NV, Alcântara-Neves  
806 NM, Pontes-de-Carvalho LC, et al. *Ocimum gratissimum* Linn. and  
807 rosmarinic acid, attenuate eosinophilic airway inflammation in an  
808 experimental model of respiratory allergy to *Blomia tropicalis*. Int  
809 Immunopharmacol. 2012;13: 126–134. doi:10.1016/j.intimp.2012.03.012.
- 810 52. Bokhari J, Khan MR. Evaluation of anti-asthmatic and antioxidant potential  
811 of *Boerhavia procumbens* in toluene diisocyanate (TDI) treated rats. J  
812 Ethnopharmacol. 2015;172: 377–385. doi:10.1016/j.jep.2015.06.049.
- 813 53. Camacho KM, Menegatti S, Mitragotri S. Low molecular weight polymer-  
814 drug conjugates for synergistic anticancer activity of camptothecin and  
815 doxorubicin combinations. Nanomed. 2016;1(9): 1139-1151.  
816 Doi:10.2217/nnm.16.33.
- 817 54. Suki B, Bartolák-Suki E, Rocco PRM. Elastase-Induced Lung Emphysema  
818 Models in Mice. Methods Mol Biol. 2017;1639: 67–75. doi:10.1007/978-1-  
819 4939-7163-3\_7.

- 820 55. Hubeau C, Kubera JE, Masek-Hammerman K, Williams CMM. Interleukin-6  
821 neutralization alleviates pulmonary inflammation in mice exposed to  
822 cigarette smoke and poly(I:C). *Clin Sci*. 2013;125: 483–493.  
823 [doi:10.1042/CS20130110](https://doi.org/10.1042/CS20130110).
- 824 56. Barczyk A, Pierzchała W, Kon OM, Cosio B, Adcock IM, Barnes PJ.  
825 Cytokine production by bronchoalveolar lavage T lymphocytes in chronic  
826 obstructive pulmonary disease. *J of Allergy and Clin Immunol*. 2006;117:  
827 1484–1492. [doi:10.1016/j.jaci.2006.02.013](https://doi.org/10.1016/j.jaci.2006.02.013).
- 828 57. Muñoz NM, Desai A, Meliton LN, Meliton AY, Zhou T, Leff AR, Dudek SM.  
829 Group V phospholipase A(2) increases pulmonary endothelial permeability  
830 through direct hydrolysis of the cell membrane. *Pulm Circ*. 2012 Apr-  
831 Jun;2(2):182-92. [doi: 10.4103/2045-8932.97604](https://doi.org/10.4103/2045-8932.97604). PMID: 22837859; PMCID:  
832 [PMC3401872](https://pubmed.ncbi.nlm.nih.gov/PMC3401872/).

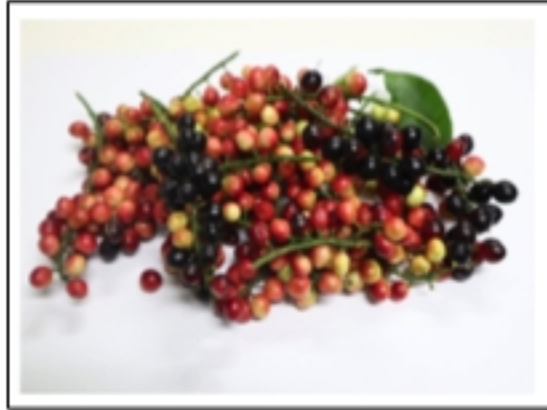

Figure 1

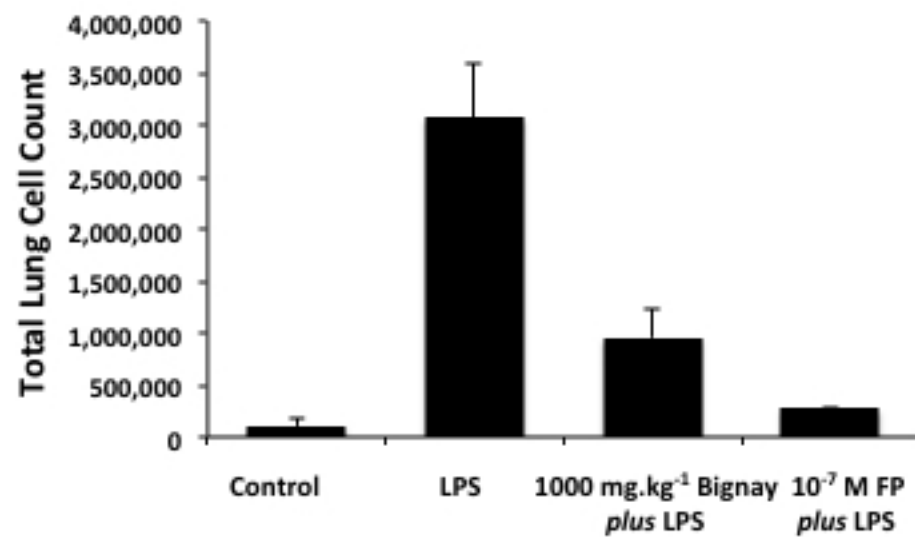

Figure 2

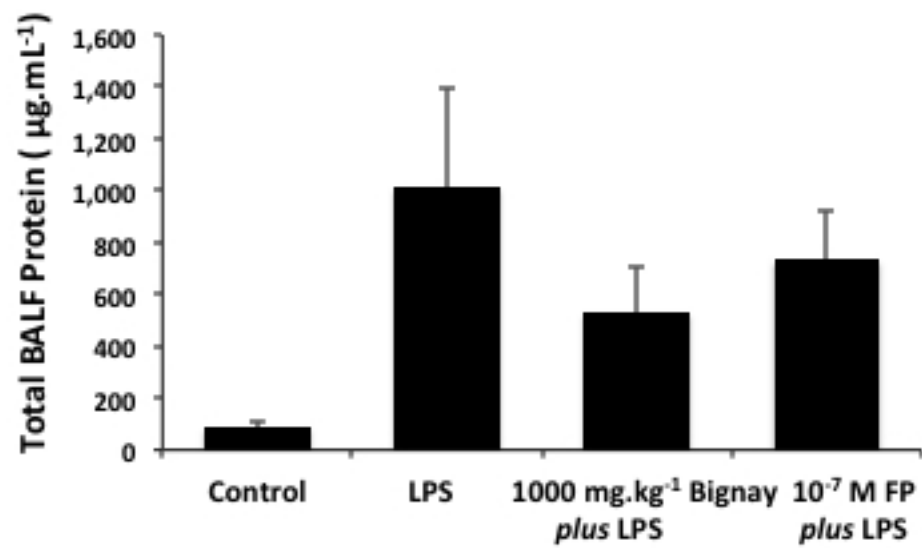

Figure 3

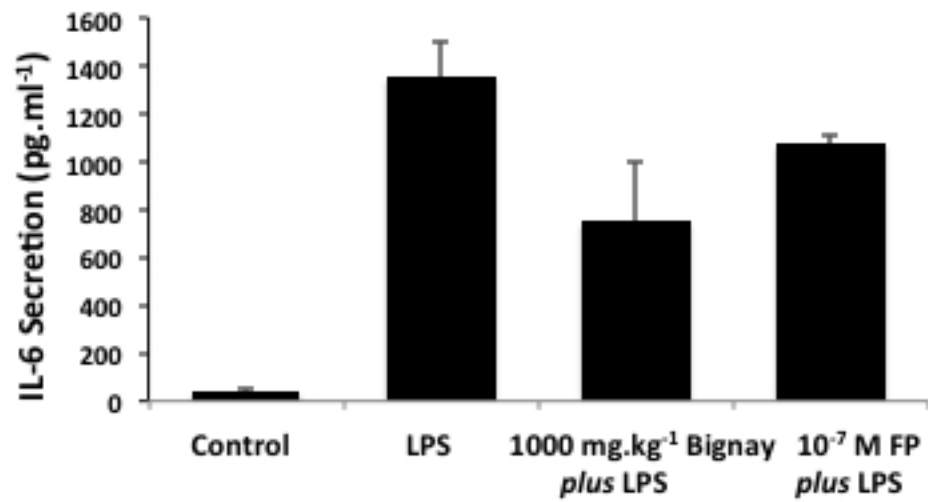

Figure 4

**A. Control**

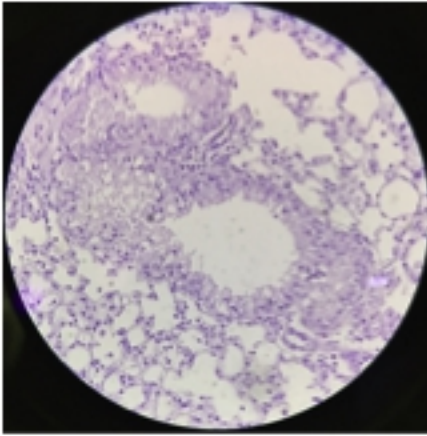

**B. 10mg.kg<sup>-1</sup> LPS alone**

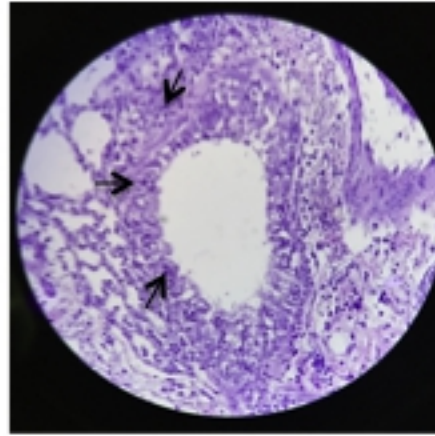

**C. 1000 mg.kg<sup>-1</sup> Bignay  
plus LPS**

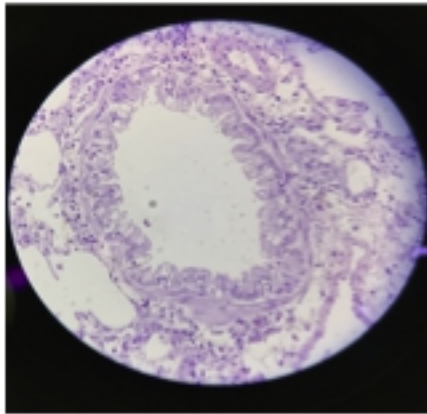

**D. 10<sup>-7</sup> M FP plus LPS**

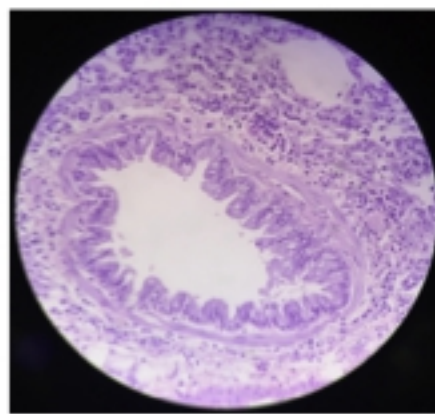

Figure 5



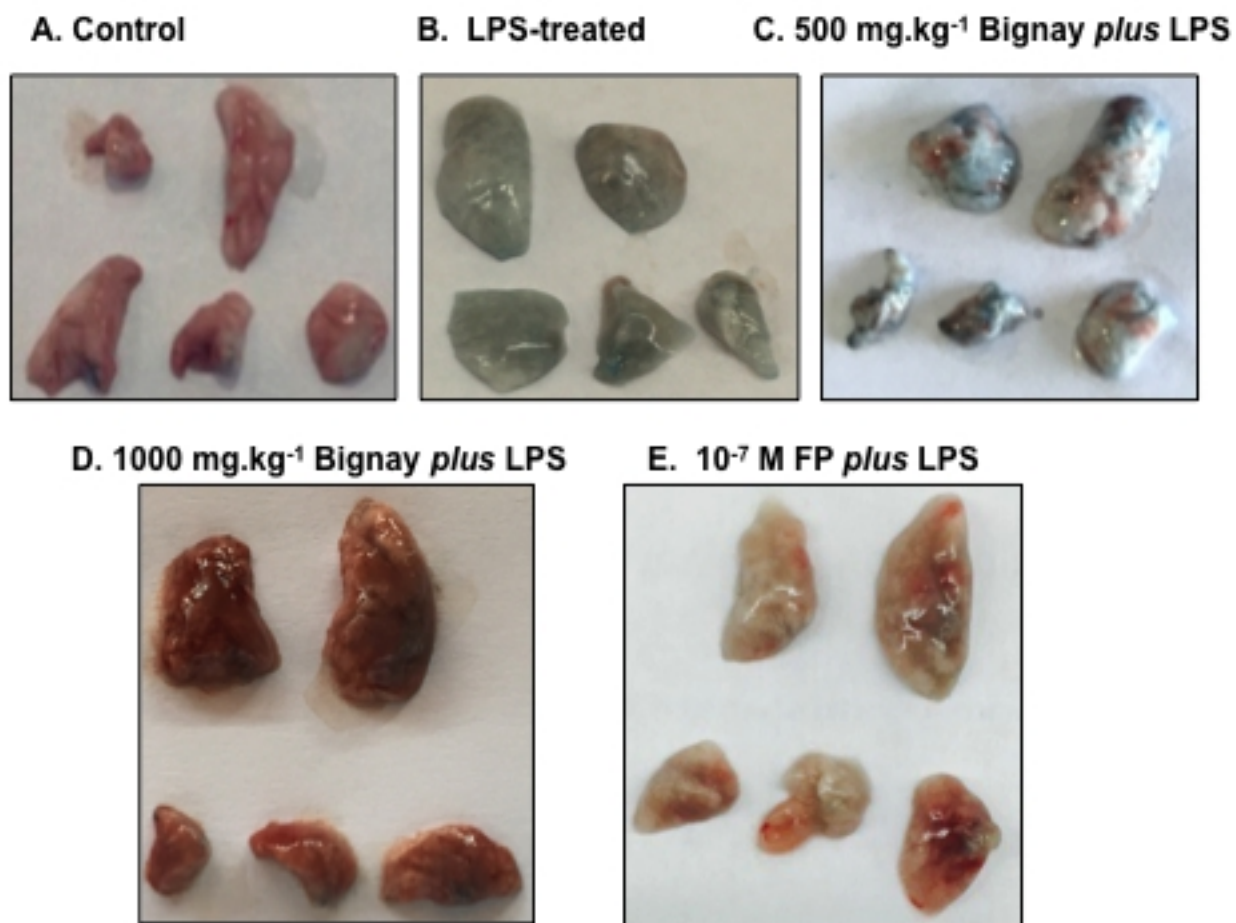

Figure 6

*Antidesma bunius* (L.)  
Spreng [Bignay]

Fluticasone Propionate (FP):  
Synthetic Glucocorticoid

- Prevents airway inflammatory responses
- No side effects
- Cost effective
- Accessible
- Easy to absorb
- LD50 = > 2000 mg.kg<sup>-1</sup> (OECD 423)
- Duration = 24 hrs

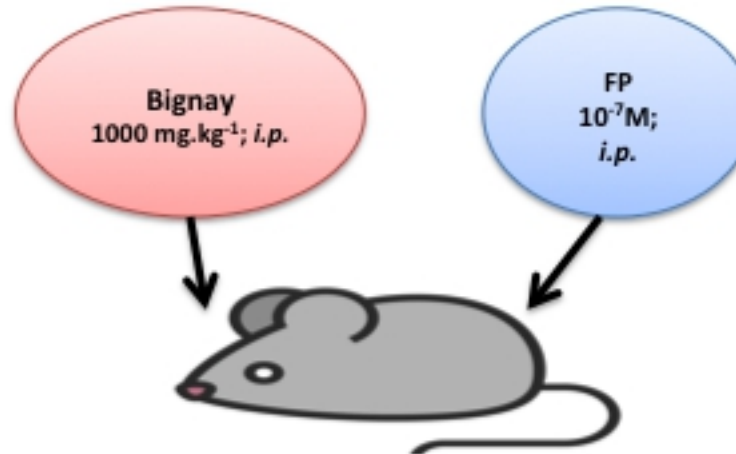

- Prevention & treatment of airway diseases
- With side effects
- High Value drug
- Enough supply
- Mol Wt = 500.57 g.mol<sup>-1</sup>
- Duration = 10 hours

Blockade of

- ✓ BAL Total Lung Cell Count
- ✓ Total BAL Protein level
- ✓ Lung Secreted IL-6
- ✓ Lung Wet:Dry Ratio
- ✓ Airway Inflammatory cell infiltrates
- ✓ Pulmonary Vascular leak

Figure 7
